# Supplementary material
Source: publisher figshare collection journal article supplement (https://acs.figshare.com/ndownloader/files/5765802)

**Synthesis and Purification of DHU-14.** DHU-14 was synthesized on an ABI synthesizer, deprotected using 50 mM  $K_2CO_3$  in anhydrous methanol for 5-7 hours at room temperature, and lyophilized to dryness. After purification by BioRad reverse phase HPLC (buffer A = 50 mM TEA-acetate, buffer B = 50% (V/V) 35 mM TEA-acetate/ $CH_3CN$ ; 10-70% B in 120 min), the 5'-trityl DHU-14 was detritylated using 5% acetic acid at room temperature for 15 min. DHU-14 was lyophilized and purified a second time by reverse phase HPLC and desalted on a Pharmacia FPLC using Hi-Trap desalting columns and deionized water. Further purification by ion exchange chromatography (Pharmacia Mono Q HR 16/10 FPLC; buffer A = deionized water, buffer B = 2M NaCl pH 7.0) was necessary to remove organic and ionic impurities. DHU-14 was lyophilized to dryness then dissolved in 0.5 mL 90% $H_2O$ /10% $D_2O$  pH 6.5 or 99.98%  $D_2O$  pH 6.5 for NMR experiments.

**Mass Spectrometry.** MALDI mass spectrometry was performed on a Bruker Reflex II instrument (reflectron MALDI-TOF) on trityl-on and trityl-off DHU-14 at the Centers for Disease Control and Prevention Biotechnology Facility (Atlanta, GA).

**NMR Spectroscopy.** All one dimensional  $^1H$  NMR experiments were performed on a GE GN-Omega 600 MHz spectrometer. All reported two dimensional NMR experiments were performed on a Varian 800 MHz spectrometer at the Complex Carbohydrates Research Center at the University of Georgia (purchased by the Georgia Research Alliance). Spectra were processed using Felix 2.3 from Biosym, Inc. on a Silicon Graphics Personal Iris or INDY workstation. All NMR spectra were collected at 5 °C unless otherwise noted. Exchangeable proton 1D NMR spectra of DHU-14 and C-14 in 0.5 mL 90%  $H_2O$ /10%  $D_2O$  at pH 6.5 were recorded using a 1331 solvent suppression sequence.<sup>1</sup> The 1D NOE experiments used a 2 s presaturation before the 11 solvent suppression sequence.<sup>2</sup> WATERGATE<sup>3</sup> Nuclear Overhauser Effect Spectroscopy (NOESY)<sup>4</sup> experiments were recorded in phase-sensitive mode<sup>5</sup> (150 ms mixing time). NOESY experiments collected in 99.98%  $D_2O$  were recorded in phase-sensitive mode (250 mixing time). The Correlation Spectroscopy (COSY)<sup>6</sup> experiment and the Total Correlation Spectroscopy (TOCSY)<sup>7</sup> experiment were collected in  $D_2O$  at pH 6.5.

## References

- (1) Hore, P. J. *J. Magn. Reson.* **1983**, *55*, 283-300.
- (2) Plateau, P.; Gueron, M. *J. Am. Chem. Soc.* **1982**, *104*, 7310-7311.
- (3) Piotto, M.; Saudek, V.; Sklenar, V. *J. Biomol. NMR* **1992**, *2*, 661-665.
- (4) Macura, S.; Huang, Y.; Suter, D.; Ernst, R. R. *J. Magn. Reson.* **1981**, *43*, 259-281.
- (5) Bax, A.; Subramanian, S. *J. Magn. Reson.* **1986**, *67*, 565-569.
- (6) Bax, A.; Freeman, R.; Morris, G. *J. Magn. Reson.* **1981**, *42*, 164-168.
- (7) Braunschweiler, L.; R., E. R. *J. Magn. Reson.* **1983**, *53*, 521-528.

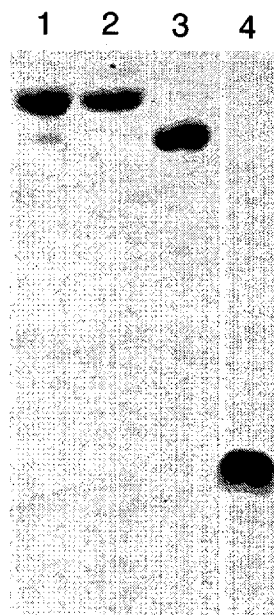

**Figure S1.** UV-shadowed non-denaturing 20% polyacrylamide gel with the self-complementary duplexes **C-14** (lane 1), **DHU-14** (lane 2), **G3-D** (5'-d(ATGGGTACCCAT)-3', lane 3), and the hairpin **G3-H** (5'-d(ATGGGTTCACCAT)-3', lane 4).

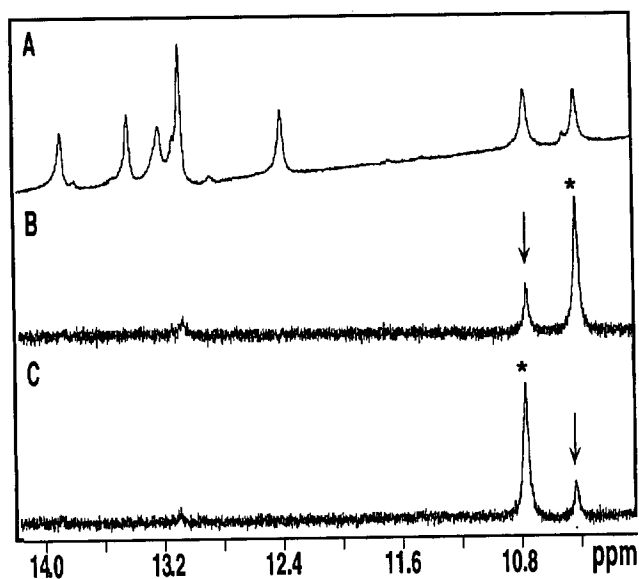

**Figure S2.** 1D NOE experiments of the imino proton region 2 mM (strands) **DHU-14** at pH 6.5 at 5 °C. The A spectrum shows the entire imino proton region. B and C are the difference spectra. Arrows in B and C indicate the magnetization transfer observed, and an asterisk marks the frequencies of presaturation.

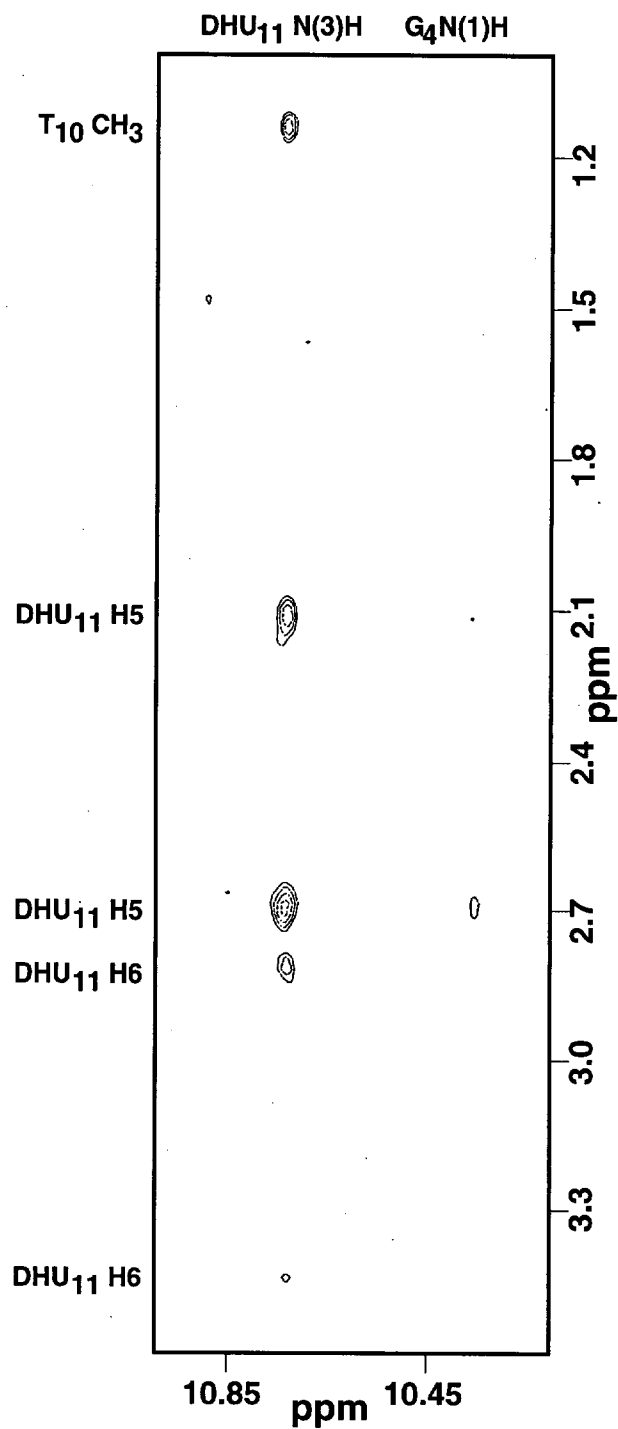

**Figure S3.** DHU<sub>11</sub> and G<sub>4</sub> imino signals/T<sub>10</sub>CH<sub>3</sub> and DHU<sub>11</sub>H5/H6 signal NOE cross-peaks found in the WATERGATE NOESY (150 ms mixing time) of 2 mM (strands) DHU-14 at pH 6.5 at 5 °C.

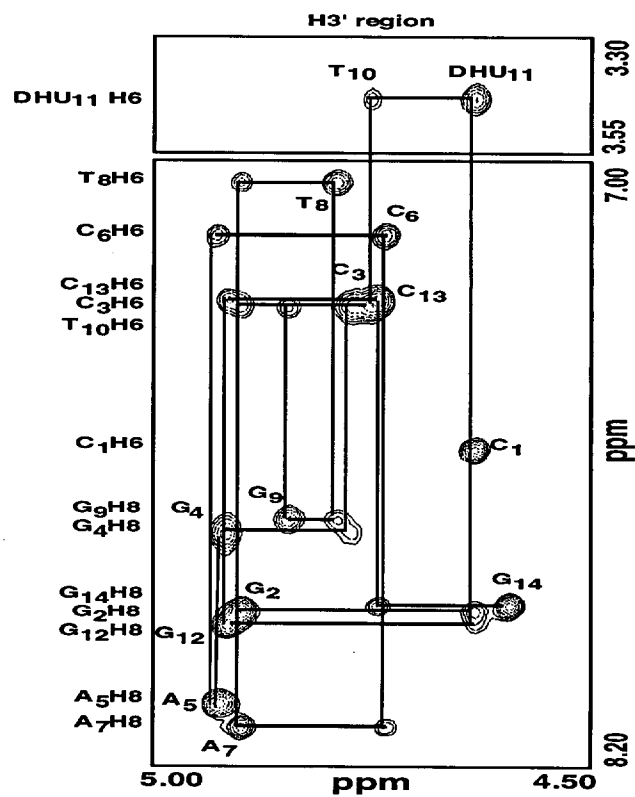

**Figure S4.** Base/H3' region of the NOESY spectrum (250 ms mixing time) of **DHU-14** in 99.98% D<sub>2</sub>O at pH 6.5 at 5 °C.

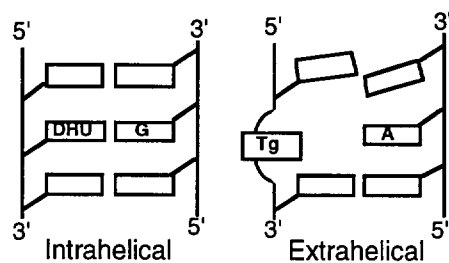

**Figure S5.** Schematic representation of the intrahelical DHU-G wobble base pair in DHU-14 vs. the extrahelical Tg found previously by Kung et. al.<sup>16</sup>

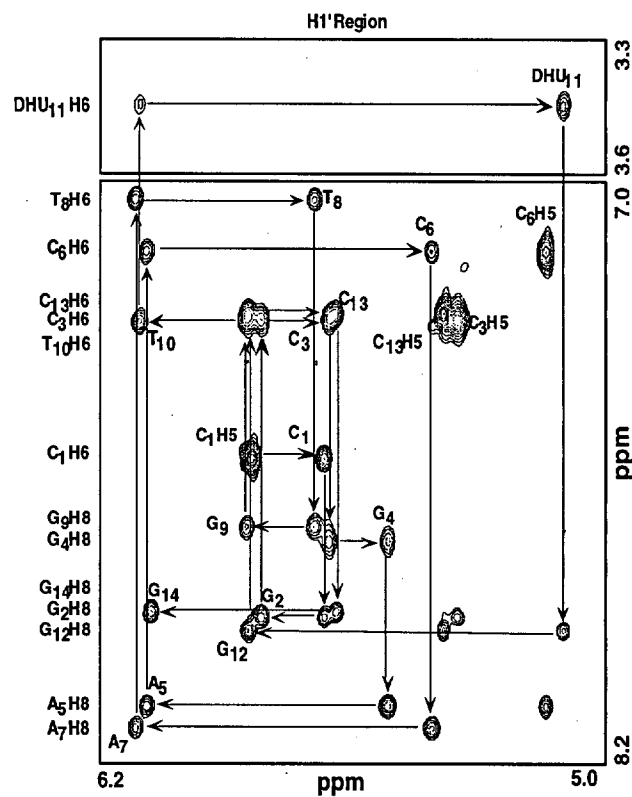

**Figure S6.** Base/H1' region of the NOESY spectrum (250 ms mixing time) of 2 mM (strands) **DHU-14** in 99.98% D<sub>2</sub>O at pH 6.5 and 5 °C.

authentic (-)-saframycin A

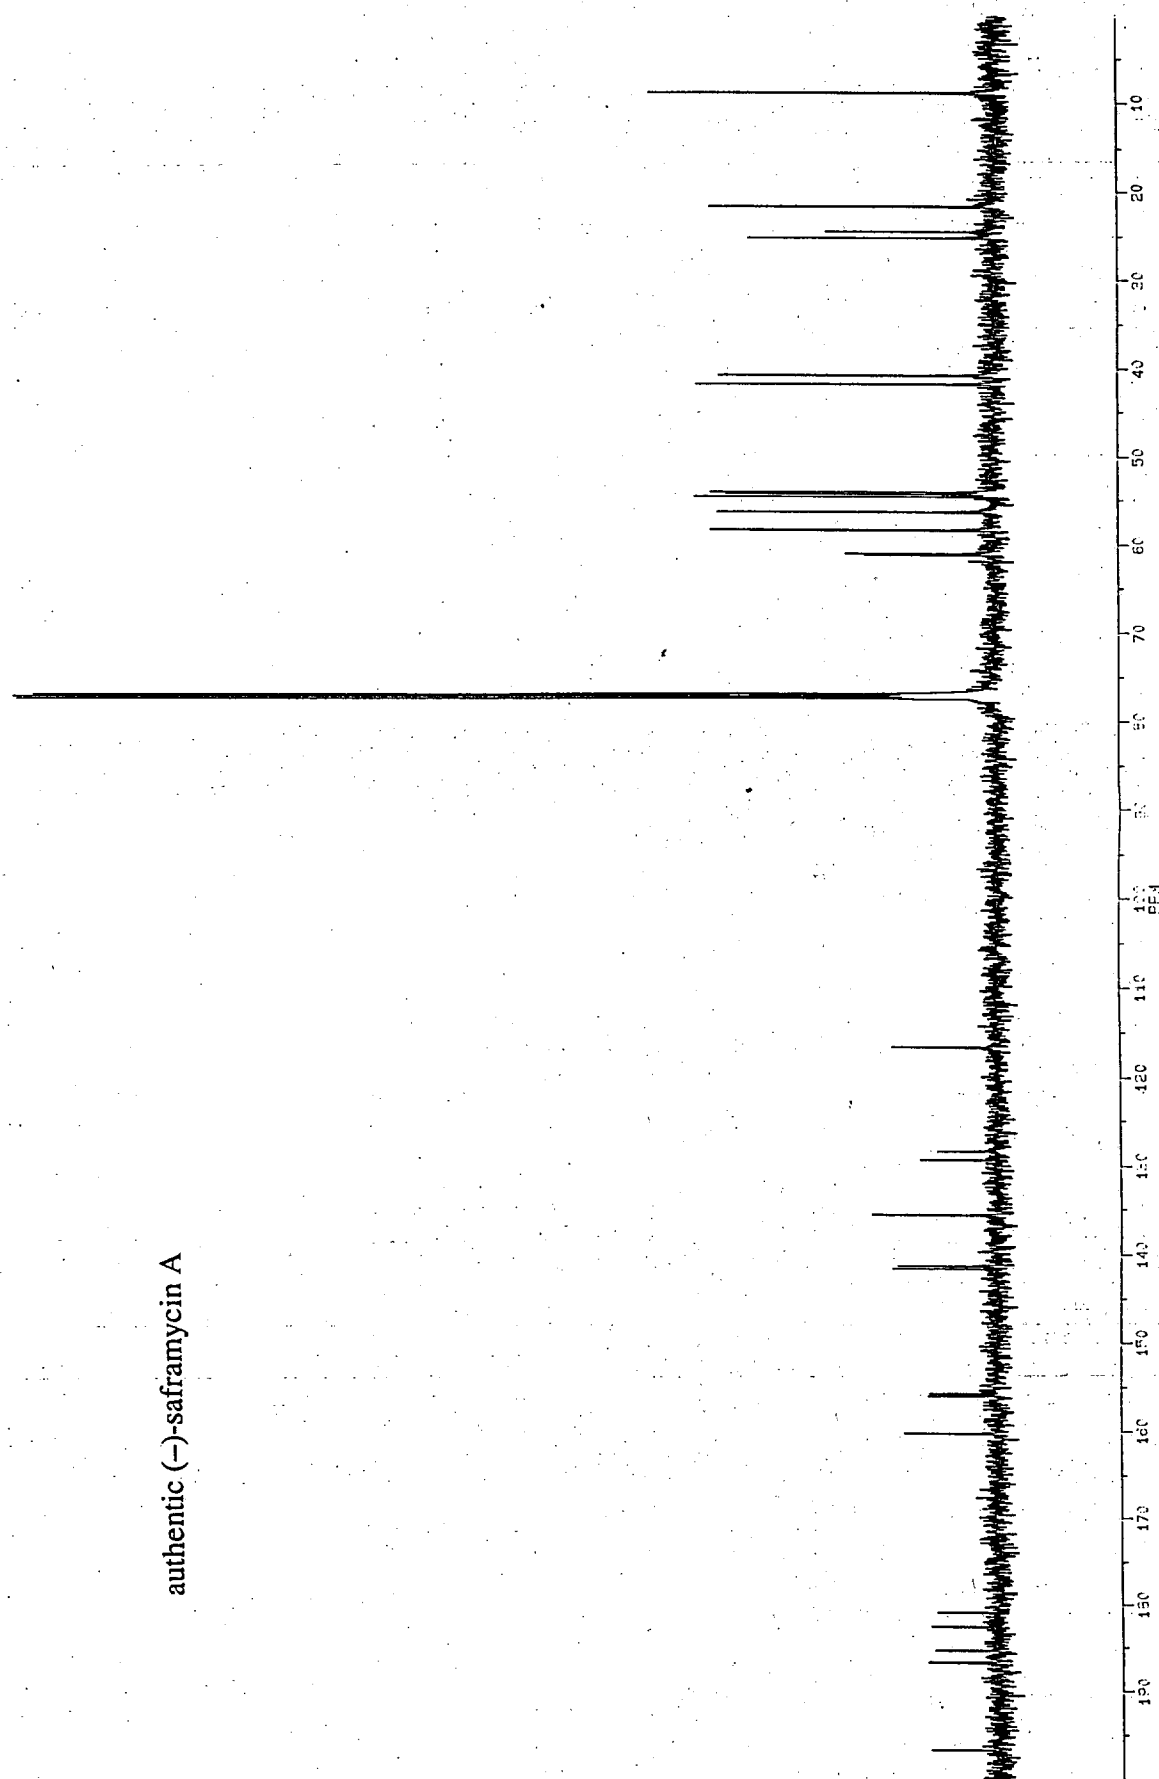

synthetic (-)-saframycin A

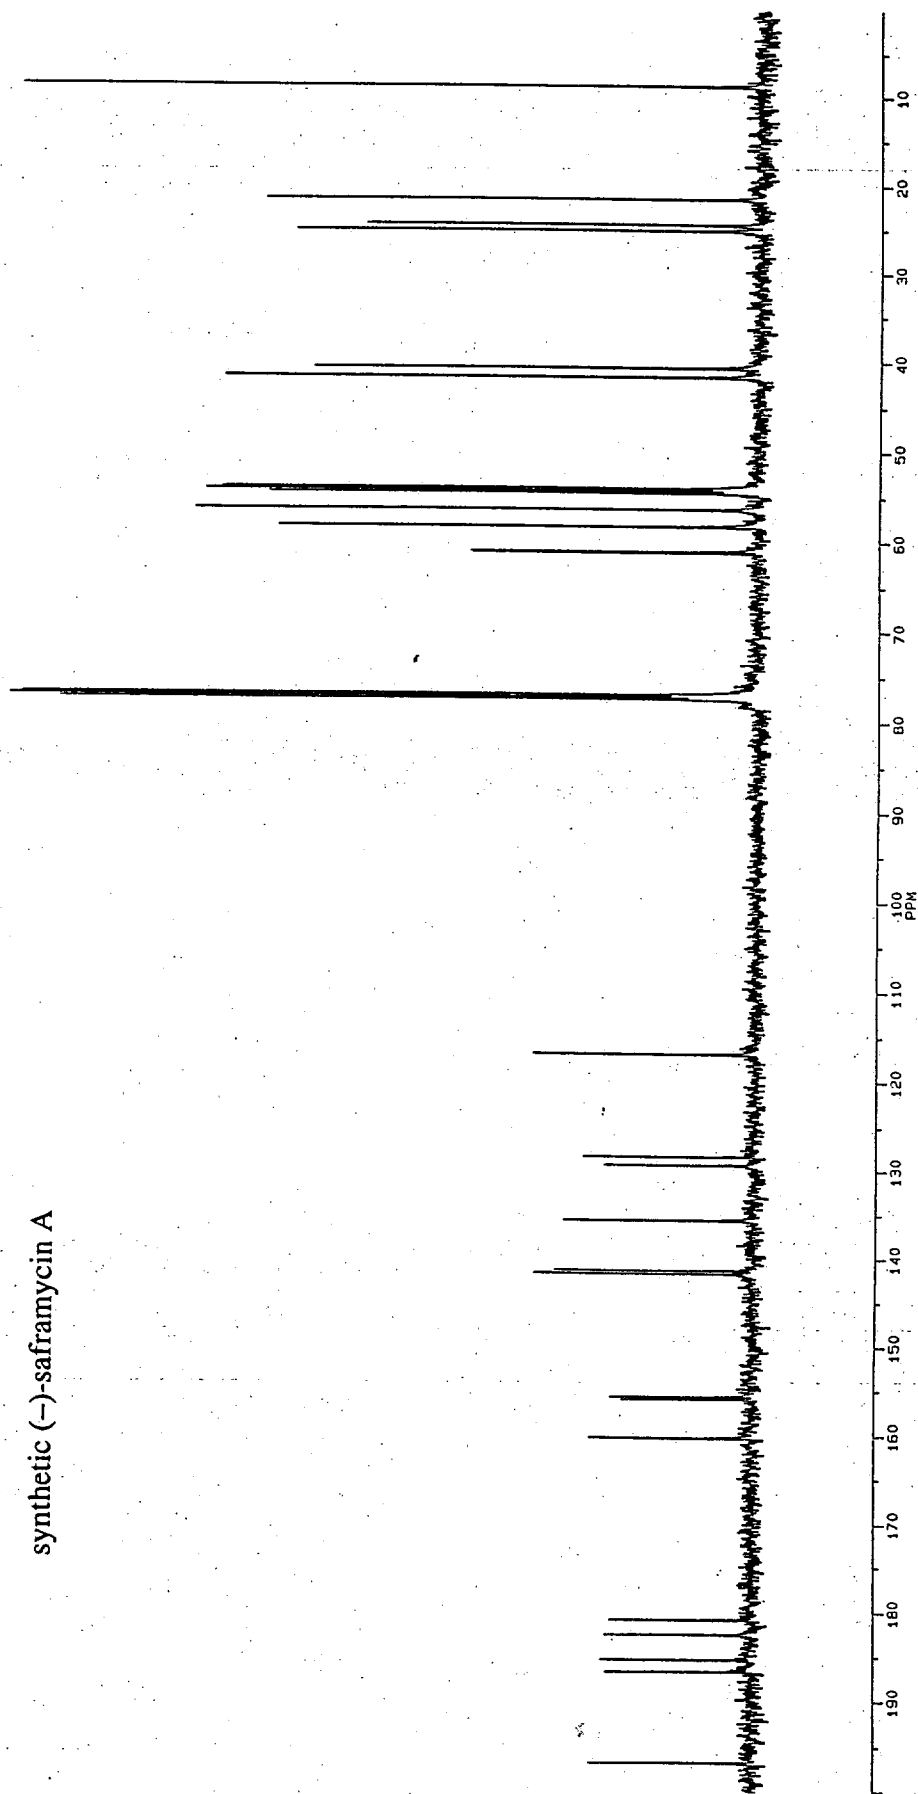

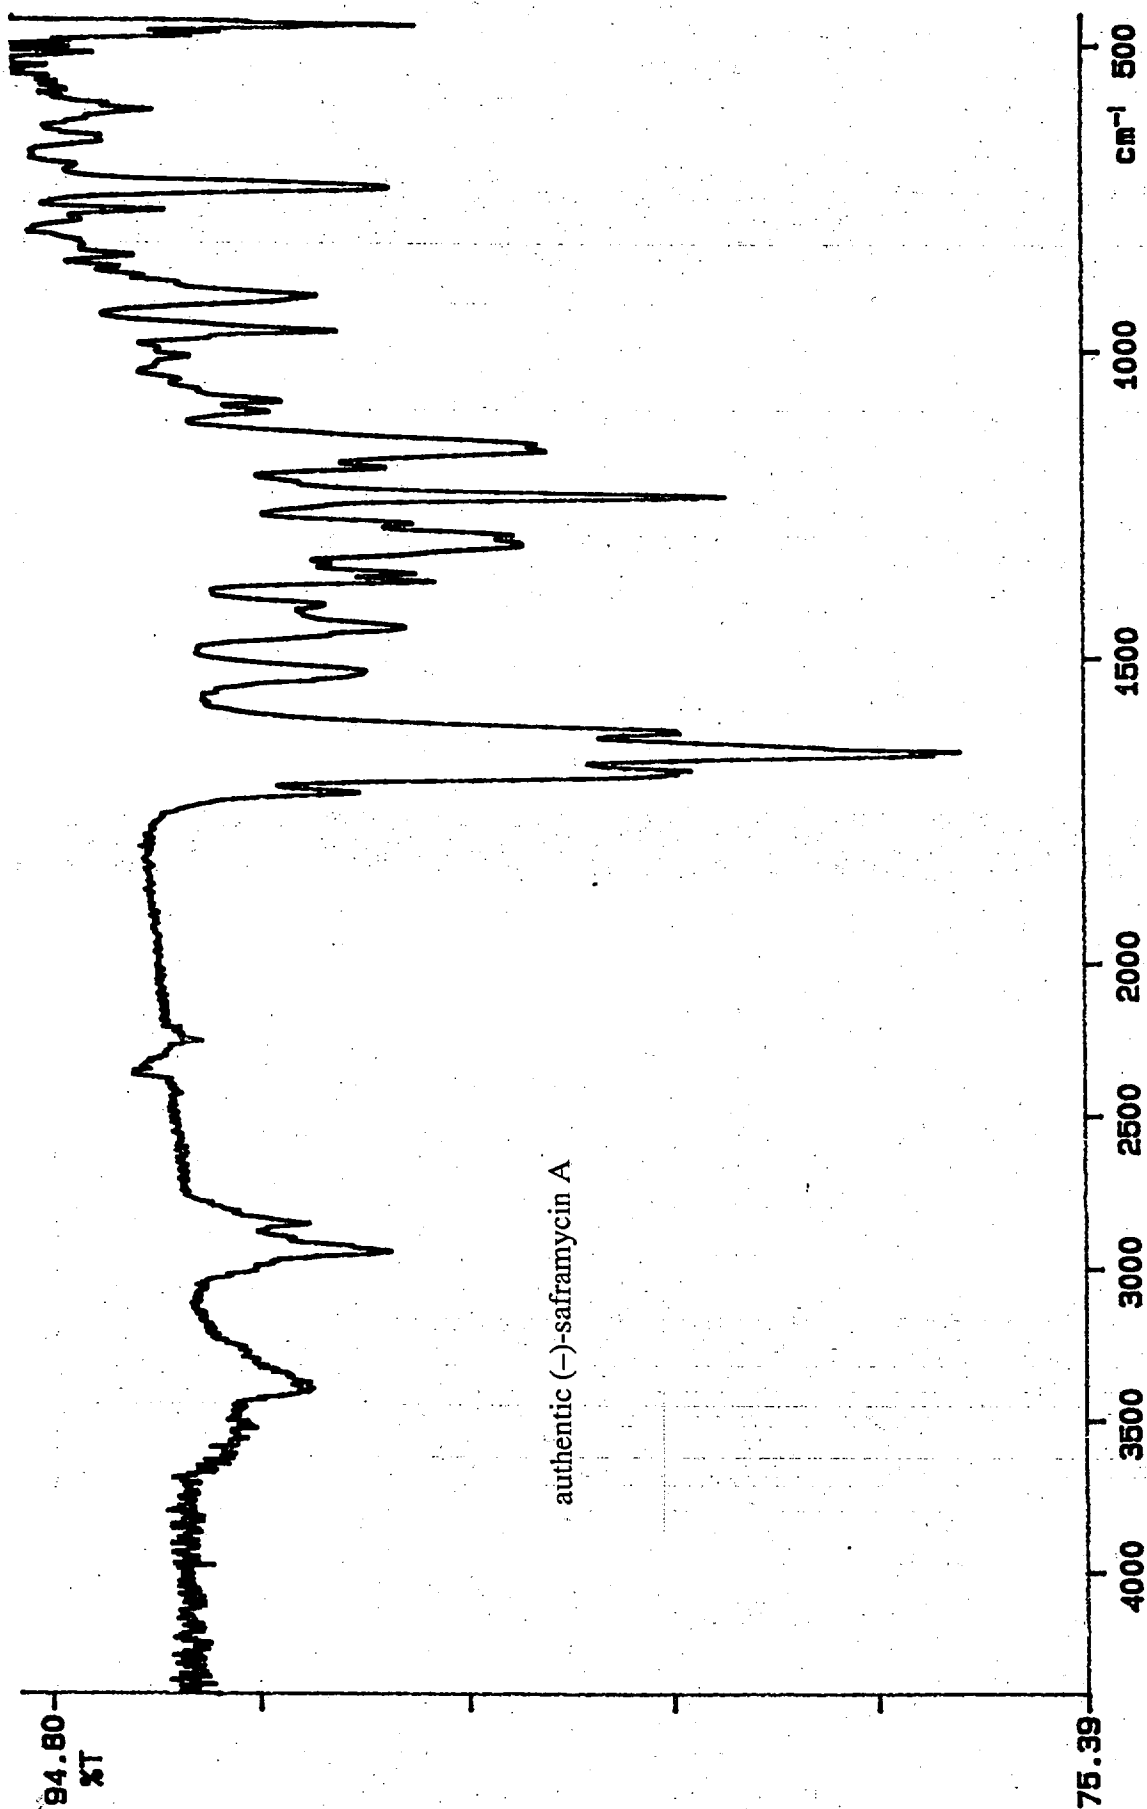

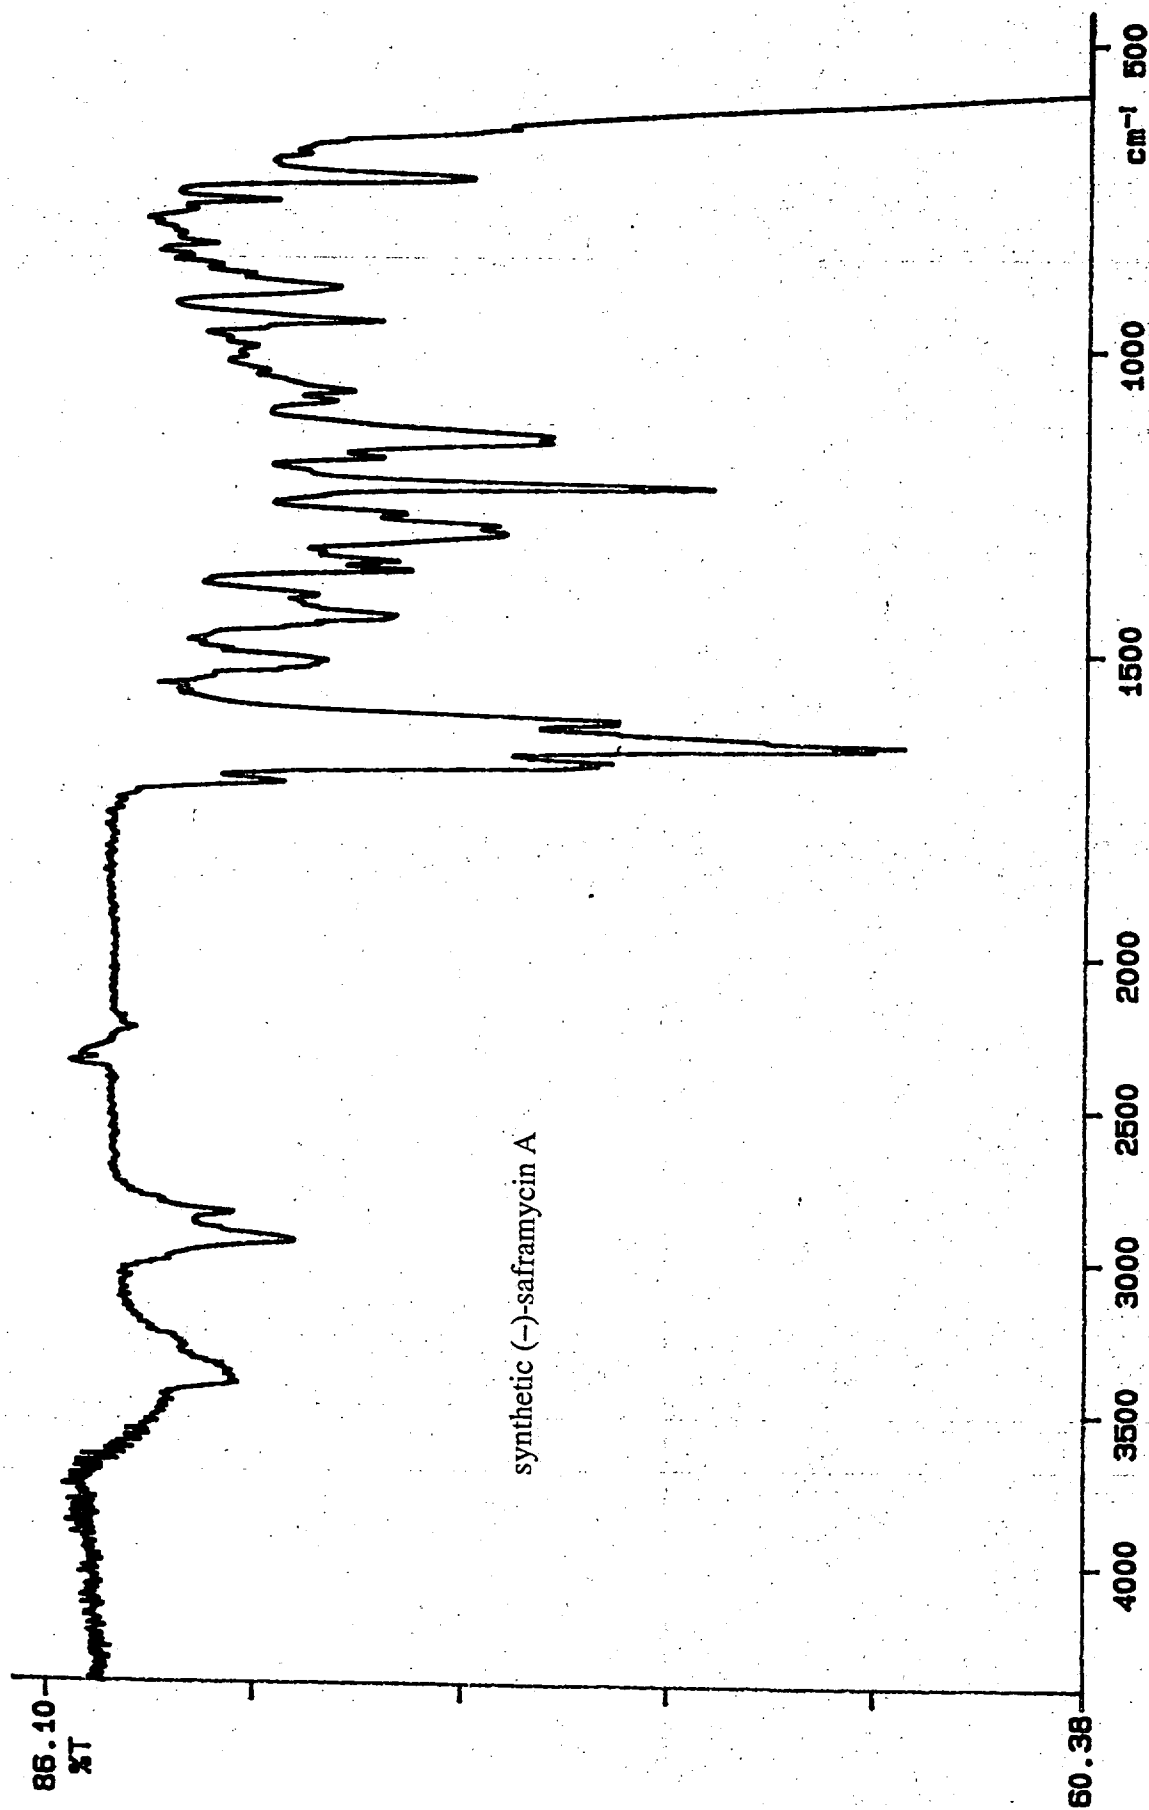

Supplement: Supplementary file 1 [file 5765802]
